# Supplementary material
Source: PubMed Central journal article supplement (PMC3067899)
Supplement: supp_31_6_1134__2.pdf [file supp_31_6_1134__2.pdf]

1  
2  
3  
4  
5  
6  
7  
8  
9  
10  
11  
12  
13  
14  
15

**Suppl. Figure 1. Apoptosis and fibrous tissue replacement in PG CKO hearts.** Heart sections from PG<sup>flox/flox</sup>/Cre<sup>-</sup> (WT) or Cre<sup>+</sup> (CKO) 5 months post Tam (A-B) were analyzed by TUNEL. Heart sections from 2 (C, D) and 9 months (E, F) post Tam were Masson's trichrome stained. Corresponding boxed areas (C, E) are shown at higher magnification (D, F). Note the increased apoptotic cells (A, B) and progressive fibrosis (C-F) in the CKO hearts.
