# Supplementary material
Source: PubMed Central journal article supplement (PMC3067899)

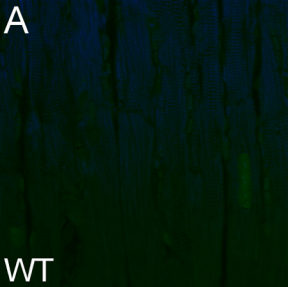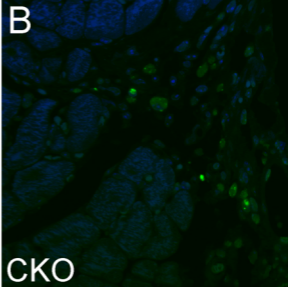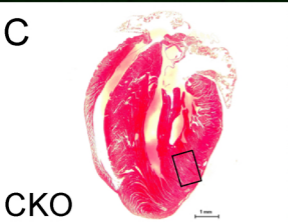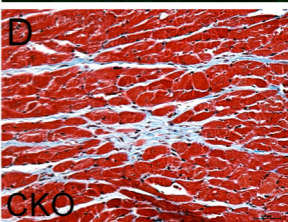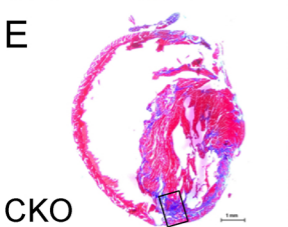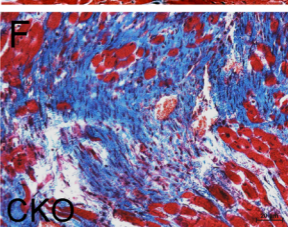

Suppl. Fig. 1

Supplement: supp_31_6_1134__1.pdf [file supp_31_6_1134__1.pdf]
